# Supplementary material for: Revisiting the association between worldwide implementation of the MPOWER package and smoking prevalence, 2008–2017
Source: PubMed Central journal article supplement — Tob Control. 2020 Sep 6;30(6):630–7. doi: 10.1136/tobaccocontrol-2020-055758 (PMC8543233; doi:10.1136/tobaccocontrol-2020-055758), 2020-09-06
Supplement: tobaccocontrol-2020-055758supp002.pdf [file tobaccocontrol-2020-055758supp002.pdf]

Appendix Table A2. Country list

| Country                | Code | WHO Region | World Bank Income Groups | Initial Condition |
|------------------------|------|------------|--------------------------|-------------------|
| Albania                | ALB  | EUR        | Upper Middle Income      | HM-HP             |
| United Arab Emirates   | ARE  | EMR        | High Income              | LM-LP             |
| Argentina              | ARG  | AMR        | Upper Middle Income      | LM-HP             |
| Armenia                | ARM  | EUR        | Lower Middle Income      | LM-HP             |
| Australia              | AUS  | WPR        | High Income              | HM-LP             |
| Austria                | AUT  | EUR        | High Income              | HM-HP             |
| Belgium                | BEL  | EUR        | High Income              | HM-HP             |
| Benin                  | BEN  | AFR        | Low Income               | LM-LP             |
| Burkina Faso           | BFA  | AFR        | Low Income               | LM-LP             |
| Bangladesh             | BGD  | SEAR       | Lower Middle Income      | LM-HP             |
| Bulgaria               | BGR  | EUR        | Upper Middle Income      | HM-HP             |
| Bahrain                | BHR  | EMR        | High Income              | LM-LP             |
| Bosnia and Herzegovina | BIH  | EUR        | Upper Middle Income      | HM-HP             |
| Belarus                | BLR  | EUR        | Upper Middle Income      | HM-HP             |
| Brazil                 | BRA  | AMR        | Upper Middle Income      | HM-LP             |
| Barbados               | BRB  | AMR        | High Income              | LM-LP             |
| Canada                 | CAN  | AMR        | High Income              | HM-LP             |
| Switzerland            | CHE  | EUR        | High Income              | HM-HP             |
| Chile                  | CHL  | AMR        | High Income              | HM-HP             |
| China                  | CHN  | WPR        | Upper Middle Income      | LM-HP             |
| Côte d'Ivoire          | CIV  | AFR        | Lower Middle Income      | LM-LP             |
| Cameroon               | CMR  | AFR        | Lower Middle Income      | LM-LP             |
| Congo                  | COG  | AFR        | Lower Middle Income      | LM-LP             |
| Cook Islands           | COK  | WPR        |                          | HM-HP             |
| Comoros                | COM  | AFR        | Low Income               | LM-LP             |
| Costa Rica             | CRI  | AMR        | Upper Middle Income      | LM-LP             |
| Czech Republic         | CZE  | EUR        | High Income              | HM-HP             |
| Germany                | DEU  | EUR        | High Income              | HM-HP             |
| Denmark                | DNK  | EUR        | High Income              | HM-HP             |
| Dominican Republic     | DOM  | AMR        | Upper Middle Income      | LM-LP             |
| Egypt                  | EGY  | EMR        | Lower Middle Income      | HM-LP             |
| Eritrea                | ERI  | AFR        | Low Income               | HM-LP             |
| Spain                  | ESP  | EUR        | High Income              | HM-HP             |
| Estonia                | EST  | EUR        | High Income              | HM-HP             |
| Ethiopia               | ETH  | AFR        | Low Income               | LM-LP             |
| Finland                | FIN  | EUR        | High Income              | HM-HP             |
| Fiji                   | FJI  | WPR        | Upper Middle Income      | LM-LP             |
| France                 | FRA  | EUR        | High Income              | HM-HP             |
| United Kingdom         | GBR  | EUR        | High Income              | HM-LP             |
| Georgia                | GEO  | EUR        | Lower Middle Income      | LM-HP             |
| Ghana                  | GHA  | AFR        | Lower Middle Income      | LM-LP             |
| Gambia                 | GMB  | AFR        | Low Income               | LM-LP             |
| Greece                 | GRC  | EUR        | High Income              | HM-HP             |
| Croatia                | HRV  | EUR        | Upper Middle Income      | HM-HP             |
| Hungary                | HUN  | EUR        | High Income              | HM-HP             |
| Indonesia              | IDN  | SEAR       | Lower Middle Income      | LM-HP             |
| India                  | IND  | SEAR       | Lower Middle Income      | HM-LP             |
| Iran                   | IRN  | EMR        | Upper Middle Income      | HM-LP             |
| Iraq                   | IRQ  | EMR        | Upper Middle Income      | LM-LP             |
| Iceland                | ISL  | EUR        | High Income              | HM-HP             |
| Israel                 | ISR  | EUR        | High Income              | HM-HP             |

|                       |     |      |                     |       |
|-----------------------|-----|------|---------------------|-------|
| Italy                 | ITA | EUR  | High Income         | HM-HP |
| Japan                 | JPN | WPR  | High Income         | HM-HP |
| Kazakhstan            | KAZ | EUR  | Upper Middle Income | HM-HP |
| Kenya                 | KEN | AFR  | Lower Middle Income | HM-LP |
| Kyrgyzstan            | KGZ | EUR  | Lower Middle Income | LM-HP |
| Cambodia              | KHM | WPR  | Lower Middle Income | LM-HP |
| Republic of Korea     | KOR | WPR  | High Income         | LM-HP |
| Kuwait                | KWT | EMR  | High Income         | HM-LP |
| Lao                   | LAO | WPR  | Lower Middle Income | LM-HP |
| Lebanon               | LBN | EMR  | Upper Middle Income | HM-LP |
| Sri Lanka             | LKA | SEAR | Lower Middle Income | HM-LP |
| Lithuania             | LTU | EUR  | High Income         | HM-HP |
| Luxembourg            | LUX | EUR  | High Income         | LM-HP |
| Latvia                | LVA | EUR  | High Income         | HM-HP |
| Morocco               | MAR | EMR  | Lower Middle Income | HM-LP |
| Republic of Moldova   | MDA | EUR  | Lower Middle Income | LM-HP |
| Mexico                | MEX | AMR  | Upper Middle Income | LM-LP |
| Mali                  | MLI | AFR  | Low Income          | LM-LP |
| Malta                 | MLT | EUR  | High Income         | HM-HP |
| Myanmar               | MMR | SEAR | Lower Middle Income | LM-HP |
| Mongolia              | MNG | WPR  | Lower Middle Income | HM-HP |
| Mozambique            | MOZ | AFR  | Low Income          | LM-LP |
| Mauritius             | MUS | AFR  | Upper Middle Income | HM-LP |
| Malaysia              | MYS | WPR  | Upper Middle Income | HM-HP |
| Namibia               | NAM | AFR  | Upper Middle Income | LM-LP |
| Nigeria               | NGA | AFR  | Lower Middle Income | LM-LP |
| Netherlands           | NLD | EUR  | High Income         | HM-HP |
| Norway                | NOR | EUR  | High Income         | HM-HP |
| Nepal                 | NPL | SEAR | Low Income          | LM-HP |
| Nauru                 | NRU | WPR  | Upper Middle Income | LM-HP |
| New Zealand           | NZL | WPR  | High Income         | HM-LP |
| Oman                  | OMN | EMR  | High Income         | LM-LP |
| Pakistan              | PAK | EMR  | Lower Middle Income | LM-LP |
| Philippines           | PHL | WPR  | Lower Middle Income | HM-HP |
| Palau                 | PLW | WPR  | High Income         | LM-HP |
| Poland                | POL | EUR  | High Income         | HM-HP |
| Portugal              | PRT | EUR  | High Income         | HM-HP |
| Paraguay              | PRY | AMR  | Upper Middle Income | LM-LP |
| Romania               | ROU | EUR  | Upper Middle Income | HM-HP |
| Russian Federation    | RUS | EUR  | Upper Middle Income | HM-HP |
| Saudi Arabia          | SAU | EMR  | High Income         | LM-LP |
| Senegal               | SEN | AFR  | Low Income          | LM-LP |
| Singapore             | SGP | WPR  | High Income         | HM-LP |
| Serbia                | SRB | EUR  | Upper Middle Income | HM-HP |
| Sao Tome and Principe | STP | AFR  | Lower Middle Income | LM-LP |
| Slovakia              | SVK | EUR  | High Income         | HM-HP |
| Slovenia              | SVN | EUR  | High Income         | HM-HP |
| Sweden                | SWE | EUR  | High Income         | HM-LP |
| Swaziland             | SWZ | AFR  | Lower Middle Income | LM-LP |
| Seychelles            | SYC | AFR  | High Income         | LM-LP |
| Chad                  | TCD | AFR  | Low Income          | LM-LP |
| Thailand              | THA | SEAR | Upper Middle Income | HM-LP |
| Tonga                 | TON | WPR  | Upper Middle Income | LM-HP |
| Tunisia               | TUN | EMR  | Lower Middle Income | HM-HP |
| Turkey                | TUR | EUR  | Upper Middle Income | HM-HP |
| Tanzania              | TZA | AFR  | Low Income          | LM-LP |

---

|               |     |     |                     |       |
|---------------|-----|-----|---------------------|-------|
| Uganda        | UGA | AFR | Low Income          | LM-LP |
| Ukraine       | UKR | EUR | Lower Middle Income | HM-HP |
| Uruguay       | URY | AMR | High Income         | HM-HP |
| United States | USA | AMR | High Income         | LM-LP |
| Uzbekistan    | UZB | EUR | Lower Middle Income | LM-LP |
| Vanuatu       | VUT | WPR | Lower Middle Income | LM-HP |
| Yemen         | YEM | EMR | Lower Middle Income | HM-LP |
| South Africa  | ZAF | AFR | Upper Middle Income | LM-LP |
| Zambia        | ZMB | AFR | Lower Middle Income | LM-LP |
| Zimbabwe      | ZWE | AFR | Low Income          | LM-LP |

---

**Note:** **AFR:** Africa; **AMR:** The Americas; **EMR:** Eastern Mediterranean; **EUR:** Europe; **WPR:** Western Pacific; **SEAR:** South-East Asia
