# Supplementary material for: Revisiting the association between worldwide implementation of the MPOWER package and smoking prevalence, 2008–2017
Source: PubMed Central journal article supplement — Tob Control. 2020 Sep 6;30(6):630–7. doi: 10.1136/tobaccocontrol-2020-055758 (PMC8543233; doi:10.1136/tobaccocontrol-2020-055758), 2020-09-06
Supplement: tobaccocontrol-2020-055758supp003.pdf [file tobaccocontrol-2020-055758supp003.pdf]

**Appendix Table A3. Regression results by World Bank income group**

|                      | (1)<br>MPOWER                 | (2)<br>Tax                    | (3)<br>MPOWE & Tax            |
|----------------------|-------------------------------|-------------------------------|-------------------------------|
| L. MPOWER Score      |                               |                               |                               |
| LIC and LMIC         | -0.073<br>(-0.308, 0.163)     |                               |                               |
| UMIC and HIC         | -0.127<br>(-0.483, 0.230)     |                               |                               |
| L. Tax Rate          |                               |                               |                               |
| LIC and LMIC         |                               | -0.025<br>(-0.104, 0.053)     | -0.024<br>(-0.110, 0.061)     |
| UMIC and HIC         |                               | -0.071**<br>(-0.127, -0.016)  | -0.070**<br>(-0.127, -0.012)  |
| L. MPOWE Score       |                               |                               |                               |
| LIC and LMIC         |                               |                               | -0.030<br>(-0.292, 0.232)     |
| UMIC and HIC         |                               |                               | -0.062<br>(-0.418, 0.295)     |
| Constant             | 21.458***<br>(15.600, 27.317) | 22.190***<br>(19.809, 24.572) | 23.022***<br>(17.522, 28.523) |
| Observations         | 565                           | 565                           | 565                           |
| Number of countries  | 116                           | 116                           | 116                           |
| Year Fixed Effect    | Yes                           | Yes                           | Yes                           |
| Country Fixed Effect | Yes                           | Yes                           | Yes                           |

Note: 95% confidence intervals in parentheses. \*\*\*  $p < 0.01$ , \*\*  $p < 0.05$ , \*  $p < 0.10$ . By definition, MPOWER score ranges from 7 to 34, and MPOWE score ranges from 6 to 29. The regression sample includes countries for which at least 2009 and 2017 prevalence, and 2008 and 2016 MPOWER and tax measures are available. Standard errors are clustered at WHO region – WB income group level. LIC and LMIC are defined as GNI per capita  $\leq$  US\$ 3995 and UMIC and HIC are defined as GNI per capita  $\geq$  3996 during the 2016 calendar year.
