# Supplementary material for: Revisiting the association between worldwide implementation of the MPOWER package and smoking prevalence, 2008–2017
Source: PubMed Central journal article supplement — Tob Control. 2020 Sep 6;30(6):630–7. doi: 10.1136/tobaccocontrol-2020-055758 (PMC8543233; doi:10.1136/tobaccocontrol-2020-055758), 2020-09-06
Supplement: tobaccocontrol-2020-055758supp005.pdf [file tobaccocontrol-2020-055758supp005.pdf]

**Appendix Table A5. MPOW, MPOE, MPWE, MOWE, POWE and tax rate regression results**

|                                      | (1)<br>Excluding<br>“E” | (2)<br>Excluding<br>“W” | (3)<br>Excluding<br>“O” | (4)<br>Excluding<br>“P” | (5)<br>Excluding<br>“M” |
|--------------------------------------|-------------------------|-------------------------|-------------------------|-------------------------|-------------------------|
| <b>L. Score</b>                      |                         |                         |                         |                         |                         |
| <i>High MPOWER – High Prevalence</i> | -0.303***               | -0.504***               | -0.294***               | -0.266***               | -0.355***               |
|                                      | (-0.456, -0.151)        | (-0.754, -0.255)        | (-0.441, -0.147)        | (-0.450, -0.082)        | (-0.508, -0.203)        |
| <i>High MPOWER – Low Prevalence</i>  | -0.368**                | -0.873**                | -0.533**                | -0.468*                 | -0.440*                 |
|                                      | (-0.689, -0.048)        | (-1.608, -0.139)        | (-1.013, -0.052)        | (-0.938, 0.002)         | (-0.944, 0.064)         |
| <i>Low MPOWER – Low Prevalence</i>   | 0.482***                | 0.519***                | 0.365***                | 0.390**                 | 0.353***                |
|                                      | (0.216, 0.748)          | (0.215, 0.824)          | (0.161, 0.569)          | (0.073, 0.706)          | (0.151, 0.555)          |
| <i>Low MPOWER – High Prevalence</i>  | -0.191                  | -0.426***               | -0.246**                | -0.192*                 | -0.235*                 |
|                                      | (-0.464, 0.082)         | (-0.720, -0.133)        | (-0.470, -0.022)        | (-0.422, 0.038)         | (-0.471, 0.002)         |
| <b>L. Tax Rate</b>                   |                         |                         |                         |                         |                         |
| <i>High MPOWER – High Prevalence</i> | -0.046**                | -0.053**                | -0.051**                | -0.052**                | -0.044**                |
|                                      | (-0.087, -0.005)        | (-0.094, -0.012)        | (-0.092, -0.011)        | (-0.094, -0.010)        | (-0.084, -0.004)        |
| <i>High MPOWER – Low Prevalence</i>  | 0.029                   | 0.021                   | 0.041                   | 0.023                   | 0.030                   |
|                                      | (-0.113, 0.172)         | (-0.097, 0.139)         | (-0.106, 0.188)         | (-0.118, 0.164)         | (-0.116, 0.177)         |
| <i>Low MPOWER – Low Prevalence</i>   | -0.115***               | -0.123***               | -0.110***               | -0.107***               | -0.112***               |
|                                      | (-0.192, -0.038)        | (-0.210, -0.036)        | (-0.173, -0.047)        | (-0.175, -0.040)        | (-0.163, -0.061)        |
| <i>Low MPOWER – High Prevalence</i>  | 0.028                   | 0.034                   | 0.031                   | 0.026                   | 0.025                   |
|                                      | (-0.124, 0.181)         | (-0.093, 0.162)         | (-0.106, 0.168)         | (-0.118, 0.169)         | (-0.111, 0.162)         |
| Observations                         | 570                     | 570                     | 570                     | 570                     | 570                     |
| Number of countries                  | 117                     | 117                     | 117                     | 117                     | 117                     |
| Year Fixed Effect                    | Yes                     | Yes                     | Yes                     | Yes                     | Yes                     |
| Country Fixed Effect                 | Yes                     | Yes                     | Yes                     | Yes                     | Yes                     |

Note: 95% confidence intervals in parentheses. \*\*\* p<0.01, \*\* p<0.05, \* p<0.10. By definition, MPOWE score respectively excluding E, O, and P ranges from 4 to 24, excluding W ranges from 4 to 19, and excluding M ranges from 4 to 25. The regression sample includes countries for which at least 2010 and 2018 prevalence, and 2008 and 2016 MPOWER and tax measures are available. Standard errors are clustered at WHO region – initial condition level.
